# Supplementary figures and images for: Pro-resolving Annexin A1-derived peptide Ac2-26 reduces nociception and mitigates joint damage in experimental osteoarthritis
Source: Research Square preprint supplement (doi:10.21203/rs.3.rs-7013885/v1), 2025-07-31

Supplementary Figure 1


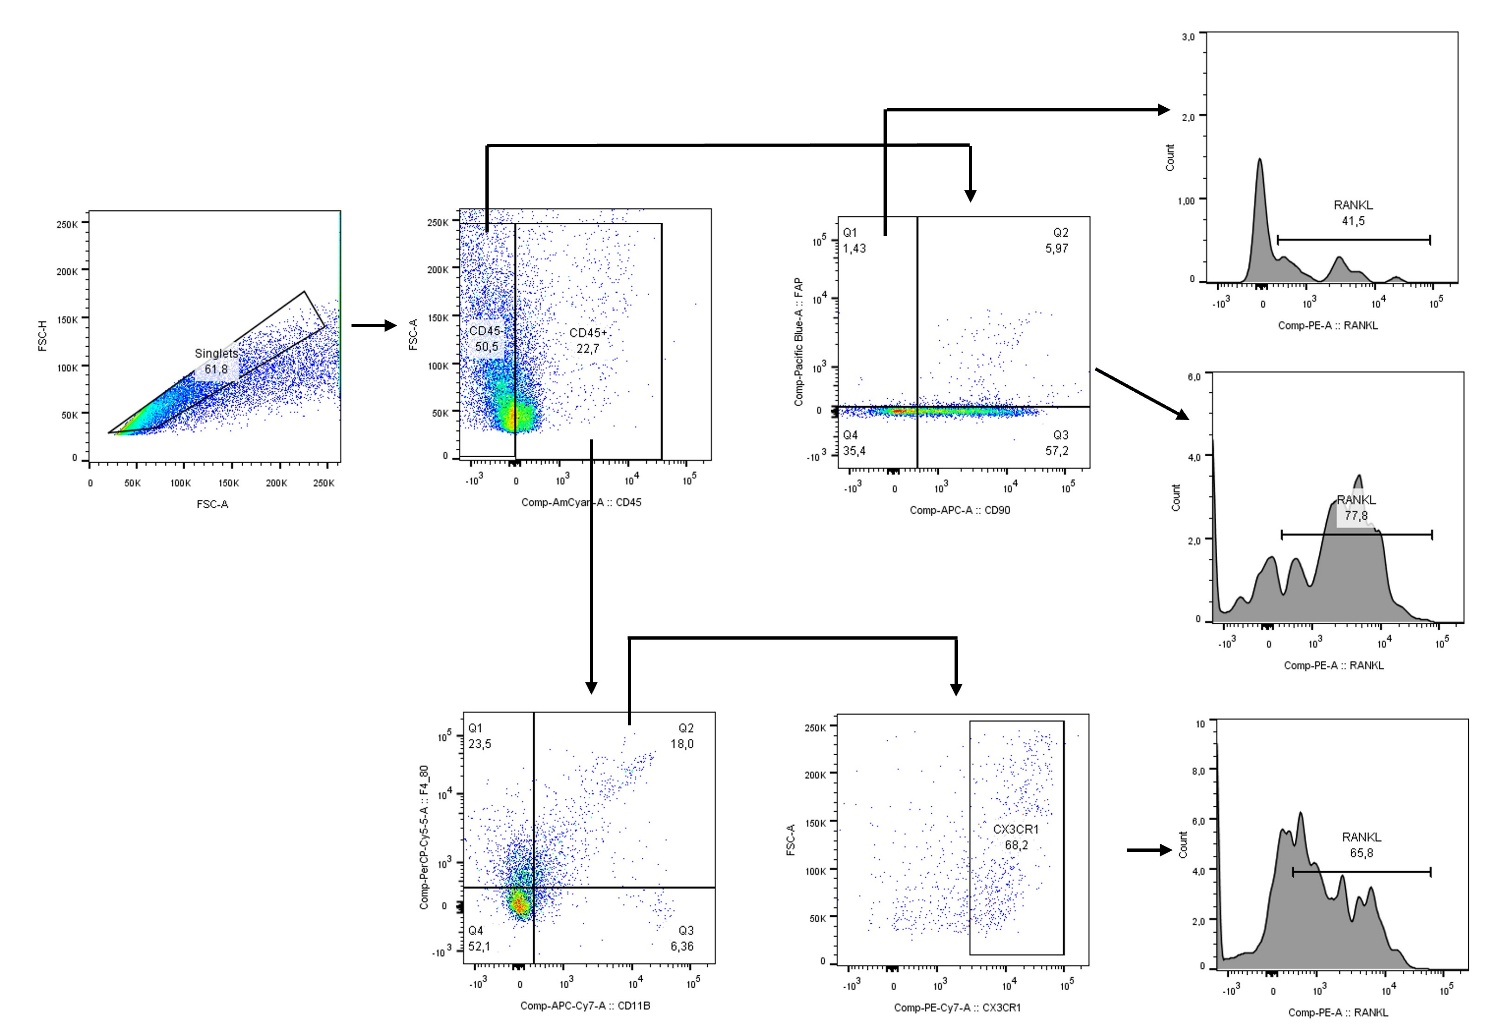
Gatting strategy related to Figure 6

Supplement: Supplementary file 1 [file 0516746a80149e6931255d4b.docx]
